# Supplementary material for: Comparative Assessment of Antitumor Effects and Autophagy Induction as a Resistance Mechanism by Cytotoxics and EZH2 Inhibition in INI1-Negative Epithelioid Sarcoma Patient-Derived Xenograft
Source: MDPI journal article supplement (doi:10.3390/cancers11071015), 2019-07-19
Supplement: s1 [file s1]

Supplementary Materials

Comparative Assessment of Antitumor Effects and Autophagy Induction as a Resistance Mechanism by Cytotoxics and EZH2 Inhibition in INI1-Negative Epithelioid Sarcoma Patient-Derived Xenograft

Silvia Stacchiotti, Valentina Zuco, Monica Tortoreto, Denis Cominetti, Anna Maria Frezza, Stefano Percio, Valentina Indio, Marta Barisella, Valentina Monti, Silvia Brich, Annalisa Astolfi, Chiara Colombo, Sandro Pasquali, Marco Folini, Mrinal M. Gounder, Maria A. Pantaleo, Paola Collini, Angelo Paolo Dei Tos, Paolo Giovanni Casali, Alessandro Gronchi and Nadia Zaffaroni

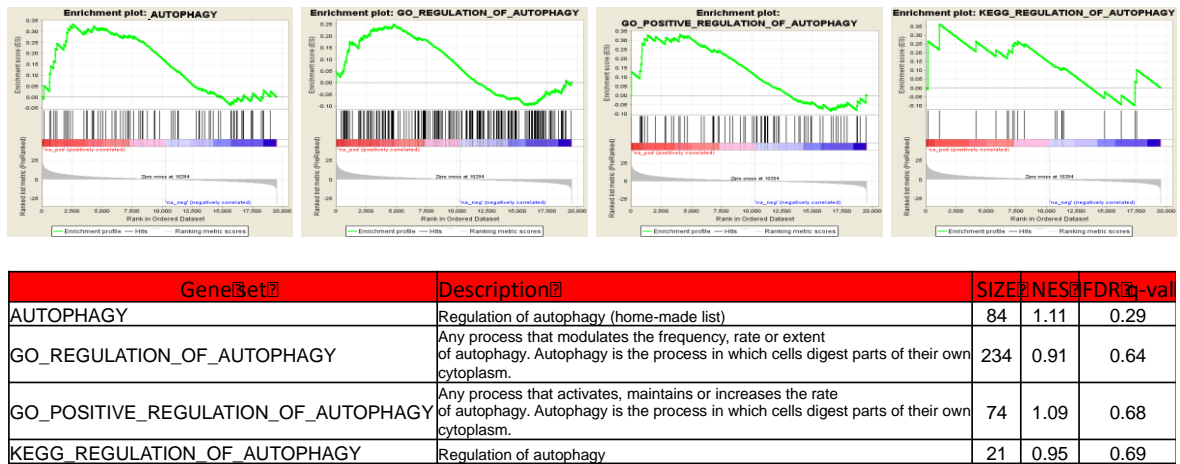

**Figure S1.** (Top) Customly defined or MSigDB signatures related to “autophagy” showed a positive enrichment trend in genes up-regulated upon EZH2 inhibition by EPZ-011989. (Bottom) Table describing statistical features such as the size of the gene set, the Normalized Enriched Score (NES) and the FDR *q*-value; a threshold of 0.05 was used to assess the significance of the enrichment.

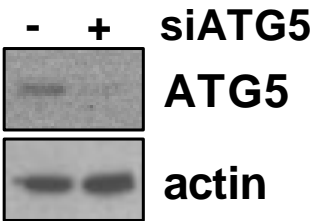

**Figure S2.** ES-1 cells were transiently transfected with control or ATG5-directed siRNAs. ATG5 levels were evaluated by Western blots after 72 h from transfection. A representative western blots of ATG5 and actin is reported.

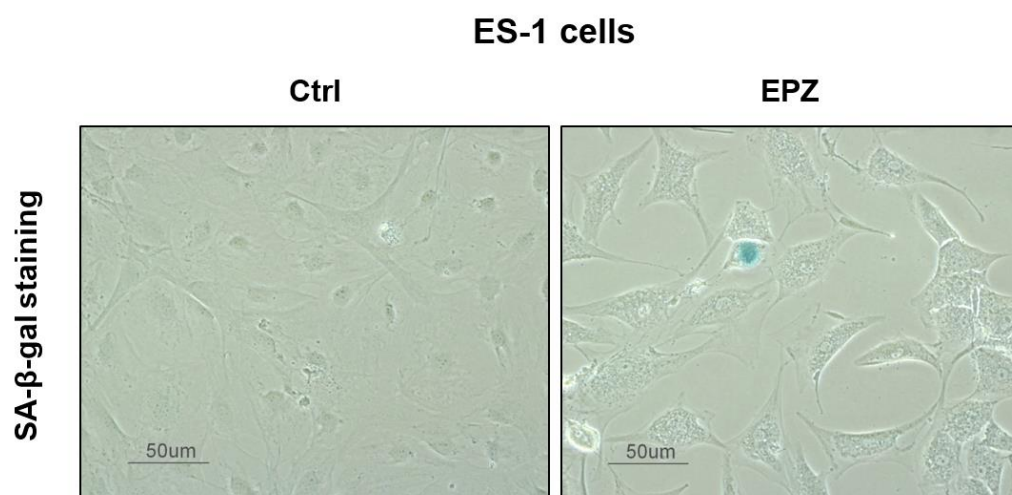

**Figure S3.** S- $\beta$ -gal staining of untreated and EPZ-011989 (100  $\mu$ M for 96 h)-treated ES-1 cells. Scale bar, 50  $\mu$ m. One representative experiment is shown.

Whole blots showing all the bands of Western blotting presented in Figures 2,4,5 in the main text.

Figure 2B

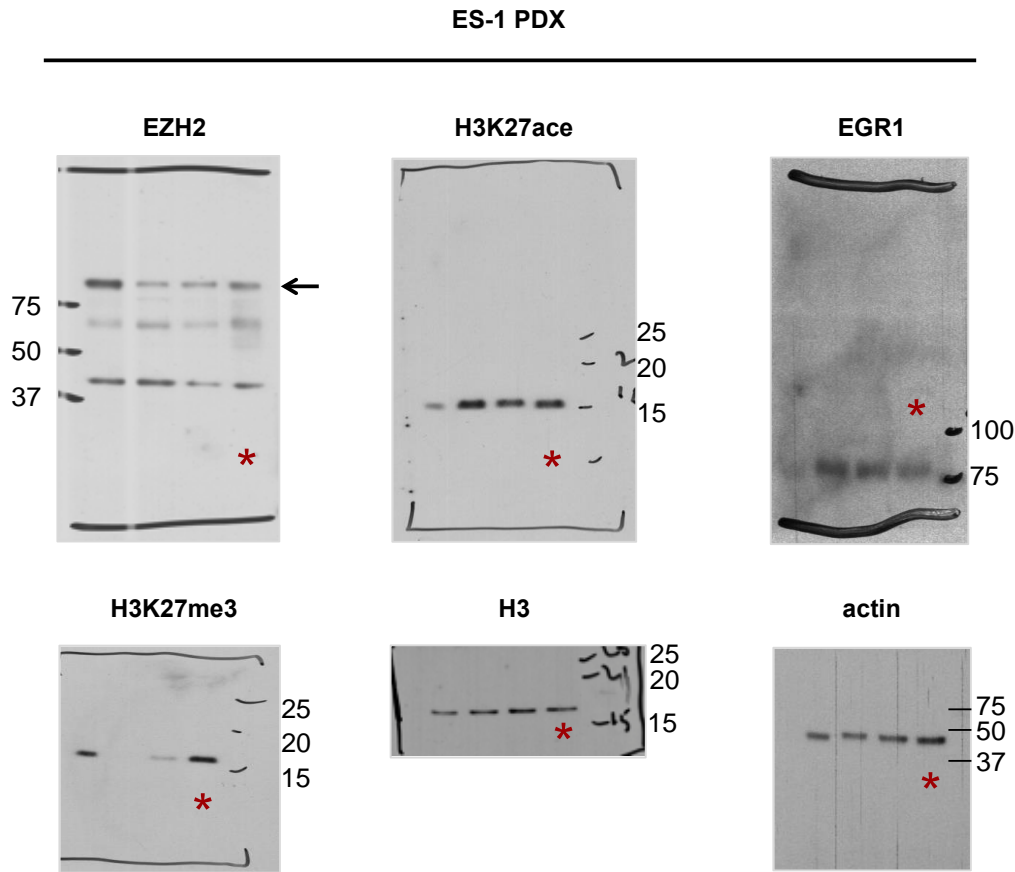

Figure 2B

ES-1 cells

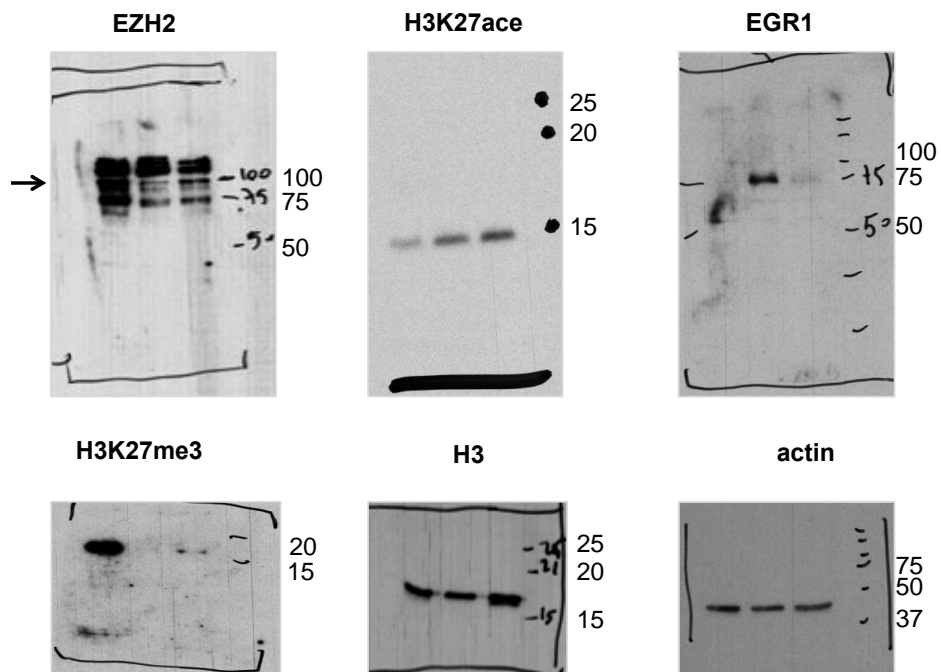

Figure 4 A,C

**A**

ES-1 PDX

LC3B-I and LC3B-II

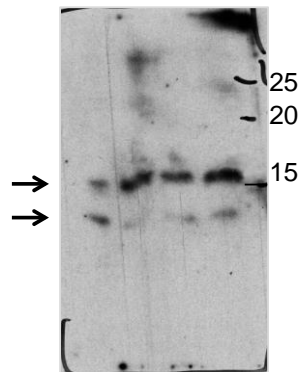

vinculin

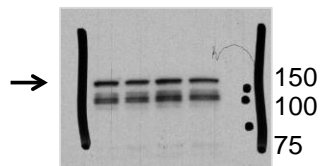

**C**

ES-1 cells

LC3B-I and LC3B-II

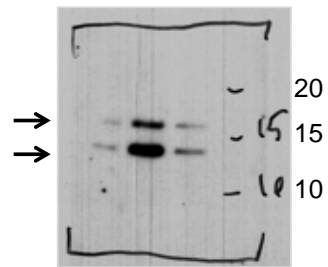

vinculin

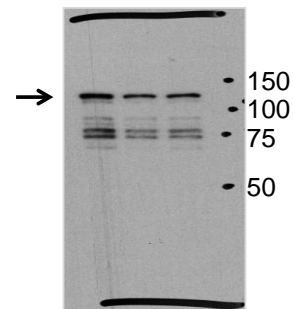

Figure 4 D

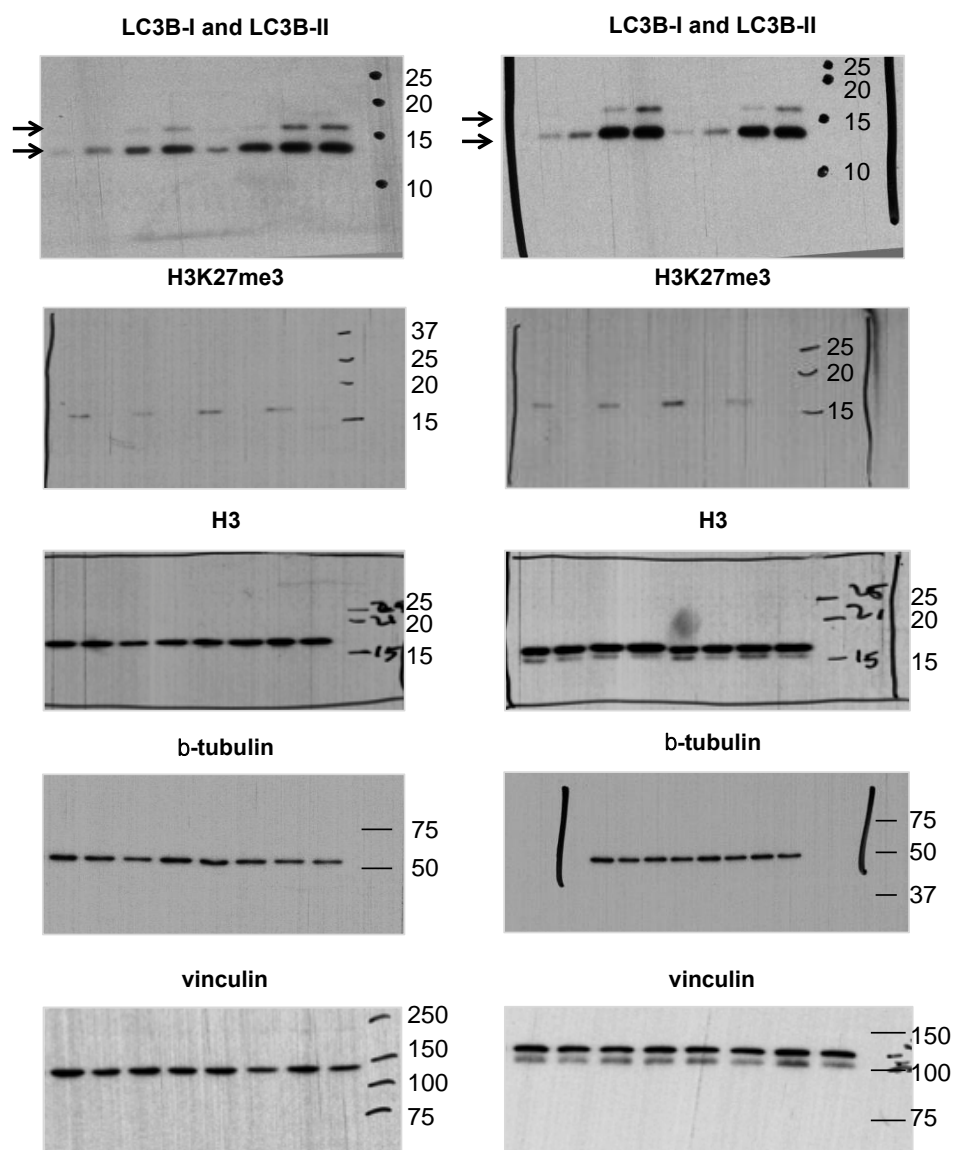

Figure 4F

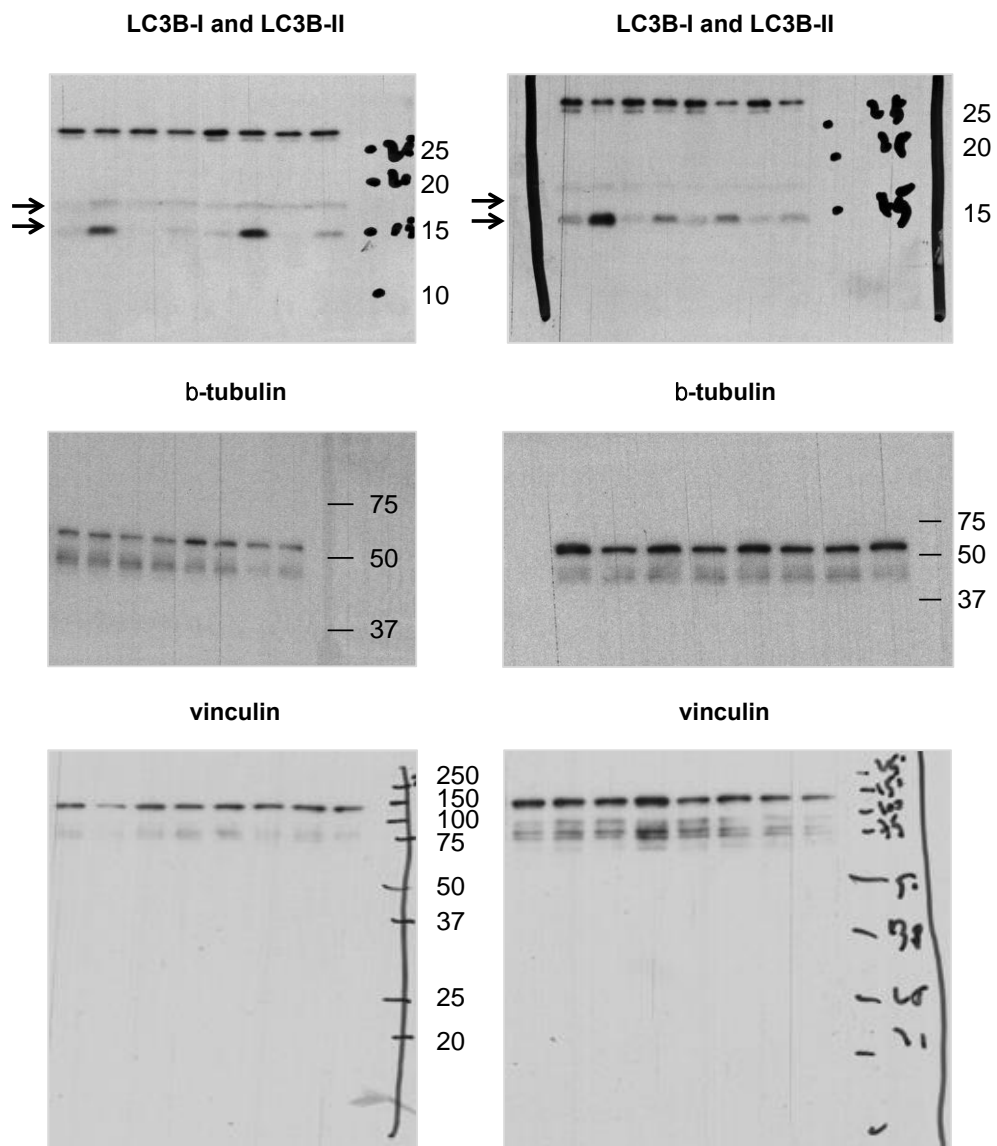

Figure 4H

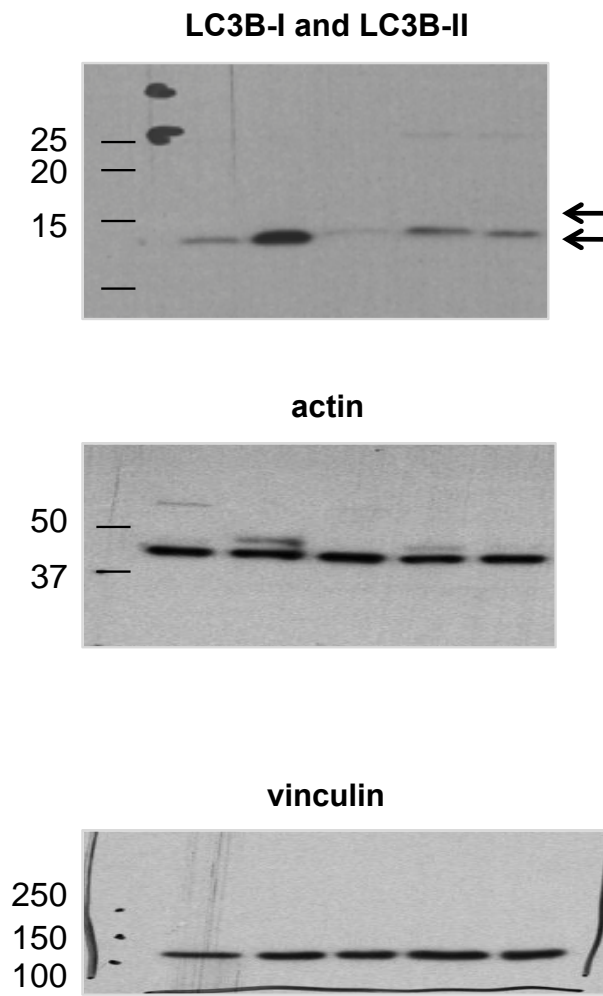



Figure 5A

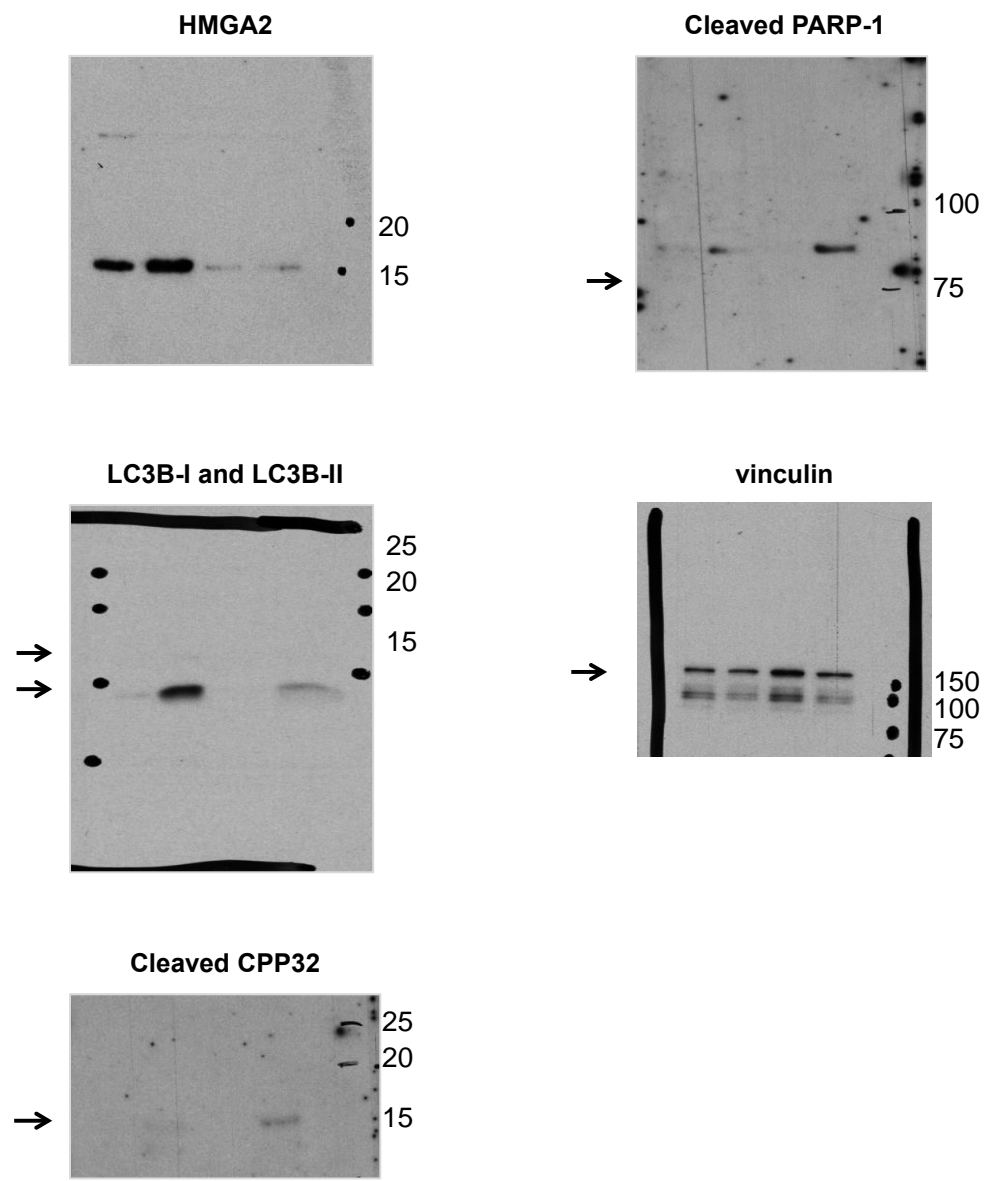

**Band intensity quantification.** Band intensities, quantified using ImageJ, were normalized to protein loading control. Actin (Figure 2) or Vinculin (Figures 4 and 5) was used as loading control.

**Figure 2B**

|             | ES-1 PDX |      |      |             | ES-1 cells |      |      |
|-------------|----------|------|------|-------------|------------|------|------|
| days        | -        | 0    | 15   | EPZ1 (mM)   | -          | 100  | 10   |
| EZH2        | 3.05     | 0.67 | 0.56 | EZH2        | 2.67       | 0.63 | 2.14 |
| H3K27me3    | 2.13     | 0.02 | 0.59 | H3K27me3    | 3.79       | 0.08 | 0.34 |
| H3K27 ac    | 0.57     | 2.67 | 1.29 | H3K27 ac    | 0.37       | 1.05 | 0.98 |
| H3          | 0.53     | 0.87 | 0.76 | H3          | 4.81       | 3.68 | 5.24 |
| EGR1        | 0.38     | 2.88 | 1.39 | EGR1        | 0.02       | 3.47 | 0.02 |
| H3K27me3/H3 | 4.04     | 0.02 | 0.78 | H3K27me3/H3 | 0.79       | 0.02 | 0.06 |
| H3K27ac/H3  | 1.08     | 3.06 | 1.70 | H3K27ac/H3  | 0.08       | 0.29 | 0.19 |

**Figure 4A**

|               | ES-1 PDX |      |      |      |
|---------------|----------|------|------|------|
| days          | -        | 0    | 15   | 32   |
| LC3B-I        | 0.64     | 1.27 | 0.96 | 1.30 |
| LC3B-II       | 0.05     | 0.15 | 0.51 | 0.81 |
| LC3B-I/LC3B-I | 0.08     | 0.12 | 0.53 | 0.62 |

**Figure 4C**

|               | ES-1 ES |      |      |
|---------------|---------|------|------|
| EPZ1 (mM)     | -       | 100  | 10   |
| LC3B-I        | 0.05    | 1.05 | 0.17 |
| LC3B-II       | 0.07    | 1.81 | 0.26 |
| LC3B-I/LC3B-I | 1.40    | 1.73 | 1.57 |

**Figure 4D**

|               | 24h  |       |       |      | 48h  |       |      |      | 72h  |       |      |      | 96h  |       |       |      |
|---------------|------|-------|-------|------|------|-------|------|------|------|-------|------|------|------|-------|-------|------|
| EPZ           | Neg  | Pos   | Neg   | Pos  | Neg  | Pos   | Neg  | Pos  | Neg  | Pos   | Neg  | Pos  | Neg  | Pos   | Neg   | Pos  |
| BafA1         | Neg  | Neg   | Pos   | Pos  | Neg  | Neg   | Pos  | Pos  | Neg  | Neg   | Pos  | Pos  | Neg  | Neg   | Pos   | Pos  |
| LC3B-I        | 0.01 | 0.03  | 0.02  | 0.20 | 0.03 | 0.08  | 0.44 | 0.71 | 0.03 | 0.01  | 2.06 | 0.62 | 0.03 | 0.01  | 0.11  | 0.54 |
| LC3B-II       | 0.10 | 0.50  | 0.72  | 1.21 | 0.25 | 2.02  | 1.40 | 1.85 | 0.12 | 0.36  | 1.41 | 1.35 | 0.07 | 0.29  | 1.28  | 1.71 |
| H3K27me3      | 0.14 | 0.03  | 0.10  | 0.02 | 0.21 | 0.03  | 0.18 | 0.03 | 0.10 | 0.03  | 0.16 | 0.02 | 0.41 | 0.02  | 0.13  | 0.02 |
| H3            | 0.53 | 1.04  | 0.54  | 0.58 | 0.53 | 1.02  | 0.56 | 0.87 | 0.45 | 0.64  | 0.71 | 0.81 | 0.68 | 0.58  | 0.55  | 0.94 |
| LC3B-I/LC3B-I | 7.55 | 19.63 | 32.27 | 5.91 | 9.79 | 26.35 | 3.20 | 2.58 | 4.56 | 32.52 | 0.69 | 2.18 | 2.51 | 35.72 | 11.19 | 3.15 |
| H3met/H3      | 0.26 | 0.03  | 0.18  | 0.04 | 0.40 | 0.03  | 0.32 | 0.03 | 0.23 | 0.04  | 0.23 | 0.02 | 0.61 | 0.04  | 0.23  | 0.02 |

**Figure 4F**

|                | 24h  |      |      |      | 48h  |      |      |      | 72h  |      |      |      | 96h  |      |      |      |
|----------------|------|------|------|------|------|------|------|------|------|------|------|------|------|------|------|------|
| EPZ            | Neg  | Pos  |
| siATG5         | Neg  | Neg  | Pos  | Pos  |
| LC3B-I         | 0.49 | 2.68 | 0.49 | 0.61 | 0.44 | 1.00 | 0.51 | 0.90 | 0.35 | 0.35 | 0.29 | 0.16 | 0.06 | 0.20 | 0.18 | 0.29 |
| LC3B-II        | 0.06 | 2.97 | 0.03 | 0.10 | 0.05 | 1.40 | 0.02 | 0.31 | 0.26 | 1.31 | 0.08 | 0.44 | 0.12 | 0.67 | 0.13 | 0.32 |
| LC3B-II/LC3B-I | 0.12 | 1.11 | 0.07 | 0.17 | 0.12 | 1.40 | 0.05 | 0.34 | 0.73 | 3.73 | 0.28 | 2.73 | 1.96 | 3.35 | 0.71 | 1.13 |

**Figure 4H**

|                |        |        |        |        |        |
|----------------|--------|--------|--------|--------|--------|
| EPZ            | -      | +      | -      | -      | -      |
| GEM            | -      | -      | +      | -      | -      |
| DX             | -      | -      | -      | +      | -      |
| 4-HCy          | -      | -      | -      | -      | +      |
| LC3B-I         | 0.0033 | 0.0041 | 0.0155 | 0.1493 | 0.0954 |
| LC3B-II        | 0.09   | 0.41   | 0.06   | 0.18   | 0.11   |
| LC3B-II/LC3B-I | 29.04  | 99.49  | 3.61   | 1.18   | 1.18   |

**Figure 5A**

|                | siNeg |      | siHMGA2 |      |
|----------------|-------|------|---------|------|
| EPZ            | -     | +    | -       | +    |
| HMGA2          | 0.81  | 1.50 | 0.07    | 0.10 |
| Cleaved CPP32  | 0.10  | 0.26 | 0.05    | 0.65 |
| Cleaved PARP-1 | 0.22  | 0.50 | 0.07    | 1.26 |
| LC3B-I         | 1.00  | 1.21 | 0.81    | 0.83 |
| LC3B-II        | 0.12  | 2.34 | 0.06    | 0.69 |
| LC3B-II/LC3B-I | 0.12  | 1.94 | 0.08    | 0.83 |

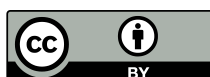

© 2019 by the authors. Licensee MDPI, Basel, Switzerland. This article is an open access article distributed under the terms and conditions of the Creative Commons Attribution (CC BY) license (<http://creativecommons.org/licenses/by/4.0/>).
